# Supplementary material for: ‘My hip is damaged’: a qualitative investigation of people seeking care for persistent hip pain
Source: HighWire-hosted journal article supplement (doi:10.1136/bjsports-2019-101281), 2020-01-24
Supplement: bjsports-2019-101281supp002_data_supplement.pdf [file bjsports-2019-101281supp002_data_supplement.pdf]

**Supplementary Table 1. Interview questions**

| <b>Common Sense Model Constructs</b> | <b>Interview Questions</b>                                                                                                                                                                                                                                                                                                               |
|--------------------------------------|------------------------------------------------------------------------------------------------------------------------------------------------------------------------------------------------------------------------------------------------------------------------------------------------------------------------------------------|
| Interpretation                       | 1. Can you tell me the story about your hip pain and how it affects you?                                                                                                                                                                                                                                                                 |
| Cause                                | 2. What do you think is the cause of your pain? Why?<br>3. What do you think makes your pain flare up (triggers)?<br>- What kind of activities catch you out?<br>- When do you feel this pain?                                                                                                                                           |
| Identity                             | 4. What have you been told about your pain / what diagnosis have you been given?<br>5. What do you think it is?<br>6. What does this mean to you?<br>7. Do you have a picture of your hip in your head? Describe it to me.                                                                                                               |
| Consequences                         | 8. What do you think this pain is telling you when you feel it?<br>- Is it telling you to stop what you are doing or change how you are doing it?<br>9. How has this problem changed your life?<br>- What does this pain keep you from doing? (Social consequences: sports, work, family, friends)<br>- How much does it bother you?     |
| Timeline                             | 10. How predictable is your hip pain?<br>11. How long do you think this is going to happen for?<br>12. Do you think you are going to get out of this situation? (Hope for recovery or loss of hope)<br>13. What do you think is going to happen to you in the future? (Degeneration? OA? Hip replacement?)                               |
| Control                              | 14. Do you feel in control of your pain?<br>15. Do you feel confident in your hip?                                                                                                                                                                                                                                                       |
| Curability                           | 16. Did you have any treatment for your hip pain?<br>17. How do you see your future treatment?<br>18. How do you want this treatment to be?                                                                                                                                                                                              |
| Action                               | 19. What do you do to try to control your pain? Why?                                                                                                                                                                                                                                                                                     |
| Appraisal                            | 20. Do you try to avoid activities because of your hip pain? Why?<br>21. Do you think your strategies are working for you?<br>22. Is there anything else you think may be affecting your situation?                                                                                                                                      |
| Emotional response to fear           | 23. How does your hip pain make you feel?<br>24. How is your overall mood? (Worried, stressed, sad, at loss, frustrated, angry)<br>25. How much are you worried about this?<br>26. What are you worried about?<br>- Are you worried of this pain happening again?<br>27. Do you think this feeling of being worried affects what you do? |
